# Supplementary material
Source: Springer Nature journal article supplement (https://www.springermedizin.de/resource/supplementary/12879_2012_2258_MOESM4_ESM.pdf/9445468)

■ Men ■ Women ■ Overall

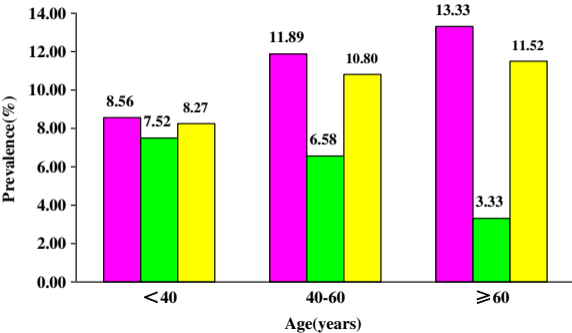

Supplement: MOESM4 [file 9445468]
